1 **Liver X Receptor  $\beta$  Controls Hepatic Stellate Cell Activation via Hedgehog**  
2 **Signaling**

3 Li Zhong<sup>1\*</sup>, Bo Ning<sup>1\*</sup>, Xuan Du<sup>3</sup>, Shengjie Huang<sup>1</sup>, Can Cai<sup>1</sup>, Youping Zhou<sup>1</sup>, Liang  
4 Deng<sup>2,\*</sup>, Wei Shen<sup>1,\*</sup>

5 <sup>1</sup>Department of Gastroenterology, 2nd Affiliated Hospital of Chongqing Medical  
6 University, Chongqing, China; <sup>2</sup>Department of Gastroenterology, The First Affiliated  
7 Hospital of Chongqing Medical University, Chongqing, China; <sup>3</sup>The second hospital  
8 of Dalian Medical university

9

10 #Present address: Department of Gastroenterology, 2nd Affiliated Hospital of  
11 Chongqing Medical University, Chongqing, China, Ph: +81 023 63693326, Fax: +81  
12 023 63693326, email: 493749713@qq.com.

13 \* And \* all Authors have made a significant contribution to the paper. Each author  
14 approves the final version of the submitted manuscript and the submission to  
15 *JOURNAL OF CELL SCIENCE*.

16

17 Competing interests: The authors declare no conflict of interest

18

19 **Running title:** LXR $\beta$  Controls Hepatic Stellate Cell Activation

20 **Key words:** hepatic fibrosis; hepatic stellate cell activation; LXR $\beta$ ; Hedgehog  
21 signaling

22

23

24 **Abstract**

25 Liver X receptors (LXR)  $\alpha$  and  $\beta$  serve important roles in cholesterol homeostasis,  
26 anti-inflammatory processes and the activation of hepatic stellate cells (HSCs).  
27 However, the development of therapies for liver fibrosis based on LXR agonists have  
28 been hampered due to side-effects such as liver steatosis. In this study, we  
29 demonstrated that HSCs expressed high levels of LXR $\beta$ , but not LXR $\alpha$ , and that

30 overexpression of LXR $\beta$  suppressed fibrosis and HSC activation in a carbon  
31 tetrachloride (CCl<sub>4</sub>)-induced fibrosis mouse model, without resulting in liver steatosis.  
32 Furthermore, Hedgehog (Hh)-regulated proteins, markedly increased in the  
33 CCl<sub>4</sub>-affected liver and mainly expressed in activated HSCs, were repressed under  
34 conditions of LXR $\beta$  overexpression. In addition, LXR $\beta$  knockout led to activation of  
35 Hh signaling and triggering of HSC activation, while overexpression of LXR $\beta$  led to  
36 the inhibition of the Hh pathway and suppression of HSC activation. These results  
37 suggest that LXR $\beta$  suppresses the activation mechanism of HSCs by inhibiting Hh  
38 signaling. In conclusion, LXR $\beta$ , by restoring the differentiation of HSCs, may be a  
39 promising therapeutic target for liver fibrosis without the adverse side-effects of  
40 LXR $\alpha$  activation.

41

#### 42 **Abbreviations**

43 LXR $\alpha$ , liver X receptor  $\alpha$ ; LXR $\beta$ , liver X receptor  $\beta$ ; HSCs, hepatic stellate cells;  
44  $\alpha$ -SMA or Acta2, smooth muscle alpha actin; collagen I, collagen, mainly of type I;  
45 HCs, hepatocytes; siRNA, small interfering RNA; Hh, Hedgehog; CCl<sub>4</sub>, carbon  
46 tetrachloride.

47

#### 48 **Introduction**

49 Fibrosis of the liver, triggered by chronic liver injury, is the overproduction of  
50 fibrillar collagen and remodeling of extracellular matrix. Left untreated, hepatic  
51 fibrosis can lead to scarring of the liver, known as cirrhosis, which is associated with  
52 significant morbidity and mortality rates. Fibrosis occurs primarily due to the  
53 activation of hepatic stellate cells (HSCs), which maintain a quiescent phenotype in  
54 the normal liver and store the majority of the retinyl esters, triglycerides and  
55 cholesterol esters of the body in lipid droplets [1-3]. Under conditions of liver injury,  
56 HSCs are activated, lose their lipid content, and undergo a transformation giving rise  
57 to a fibrogenic myofibroblastic phenotype [4,5]. Activated HSCs exhibit high  
58 proliferative activity and overexpress smooth muscle  $\alpha$  actin ( Acta2 ) and collagen,  
59 mainly of type I (collagen I) [6,7].

60 HSC activation and the conversion to a myofibroblastic phenotype are associated  
61 with a marked decrease in the expression of several adipogenic transcription factors,  
62 including the liver X receptors (LXRs) [8]. LXRs, occurring as two isoforms ( $\alpha$  and  
63  $\beta$ ), function as sensors of cholesterol levels, prompting reverse cholesterol transport  
64 and its excretion into bile. Previous studies have revealed certain beneficial effects of  
65 these proteins on inflammation, atherosclerosis, and diabetes [9,10], making them  
66 promising therapeutic targets for these conditions. LXRs also play an important role  
67 in HSC activation and susceptibility to liver fibrosis [11,12]. Nevertheless, activation  
68 of LXRs leads to enhanced hepatic triglyceride synthesis and may give rise to liver  
69 steatosis and hypertriglyceridemia, hampering therapeutic development based on  
70 LXR agonists [13]. However, LXR $\alpha$  and LXR $\beta$  exhibit distinct distributions, and  
71 certain studies have indicated that it is LXR $\alpha$ , predominantly expressed in hepatocytes  
72 (HCs), that specifically mediates the increase of triglyceride synthesis [14,15].  
73 Although LXRs have already been proven to influence the activation of HSCs, the  
74 specificity of the two isoforms and their molecular mechanisms remain unresolved.  
75 The aims of this research, therefore, were to investigate the antifibrogenic role of  
76 LXR $\beta$  in the process of HSC activation *in vitro* and *in vivo*. If confirmed,  
77 LXR $\beta$ -selective agonists may be a potential therapeutic target to avoid HSC  
78 activation-associated fibrosis, simultaneously avoid undesirable LXR $\alpha$ -associated  
79 side-effects.

80 In the present study, we isolated HSCs from mice and specifically silenced  
81 LXR $\alpha$  or LXR $\beta$  in order to evaluate the distinct roles of the isoforms in the activation  
82 of HSCs. We discovered that HSCs predominantly express LXR $\beta$ . The silencing of  
83 LXR $\beta$  by small interfering RNA (siRNA) significantly inhibited LXR target gene  
84 expression and promoted the activation of HSCs *in vitro*. Notably, LXR $\alpha$  knockdown  
85 had no significant effect on the expression of LXR target genes or the activation of  
86 HSCs. Moreover, the HSCs in LXR $\beta$ -overexpressing mice were resistant to carbon  
87 tetrachloride (CCl<sub>4</sub>)-induced activation. Hedgehog (Hh) signaling has been revealed  
88 to be important in the promotion of HSC activation and conversion to the  
89 myofibroblastic phenotype [16,17]. In chronic liver injury, Hh signaling plays a major

90 role in liver fibrogenesis [18], therefore, its association with the protective function of  
91 LXR $\beta$  was also investigated. The results of the present study demonstrate that LXR $\beta$   
92 regulates the activation of HSCs and prevents CCl<sub>4</sub>-induced fibrosis via Hh signaling,  
93 simultaneously avoiding undesirable LXR $\alpha$ -associated liver steatosis side-effects.  
94 Specific activators of LXR $\beta$  may be used as potential therapeutic agents against liver  
95 fibrosis.

96

## 97 **Materials and Methods**

### 98 **1. Animals and diets**

99 Male C57/BL6 mice were obtained from Chongqing Medical University. All  
100 mice were housed individually in plastic cages with free access to standard chow and  
101 water. Chronic liver injury in the mice was induced by intraperitoneal (IP) injections  
102 of a 10% CCl<sub>4</sub> solution in olive oil (0.5  $\mu$ l pure CCl<sub>4</sub>/g body weight) 2 times per week  
103 for 5 weeks. Alternatively, mice were administered IP injections of LXR agonist  
104 T0901317 (50 mg/kg body weight; dissolved in DMSO at 50 mg/ml) every 3 days.  
105 The animals in the control groups received equivalent doses of DMSO and vehicle  
106 olive oil. To determine the antifibrotic effects of LXR $\beta$ , adenovirus vector (Genechem,  
107 Shanghai, China) encoding the cDNA of murine LXR $\beta$  (Ad-LXR $\beta$ ) or empty control  
108 vector (Ad-control) were injected via the tail vein ( $1 \times 10^8$  virus particles/mouse). The  
109 animal experimental procedures were performed according to the National Institutes  
110 of Health Guidelines for the Use of Experimental Animals and approved by the Ethics  
111 Committee and the Medicine Animal Care Committee of Chongqing Medical  
112 University.

113

### 114 **2. Cell isolation and culture**

115 HCs and HSCs were isolated from adult male C57 mice as previously described  
116 [19]. Briefly, the mice livers were perfused *in situ* with collagenase IV (0.5 mg/ml,  
117 Gibco; Thermo Fisher Scientific, Inc., USA) for approximately 20 min until the liver  
118 became smooth and soft. The liver was excised and placed in a dish containing Gey's  
119 balanced salt solution (GBSS) with 0.5 mg/ml collagenase IV and 20  $\mu$ g/ml DNase I.

120 The liver capsule was opened using forceps and the cell suspension was gently  
121 dissociated using a plastic pipette. The cell suspension was filtered through a 200- $\mu$ m  
122 gauze to remove undigested tissue, and centrifuged at 50 x g for 2 min at 4°C in a  
123 50-ml tube . HCs are main components of the resulting cell pellet, while HSCs are  
124 light and remain in the supernatant. The pelleted HCs were further resuspended in 48%  
125 Percoll and purified by centrifugation at 50 x g for 10 min. The aforementioned  
126 supernatant containing the HSCs was transferred to a new 50-ml tube and centrifuged  
127 at 500 x g for 7 min at 4°C to pellet the HSCs, which were then resuspended and lysed  
128 in GBSS with 0.5 mg/ml pronase E and 20  $\mu$ g/ml DNase I for 20 min at 37°C to lyse  
129 the HSCs. The mixture was centrifuged at 500 x g for 7 min at 4°C, the cell pellet was  
130 resuspended in 12 ml 15% Optiprep diluted in GBSS, and 12 ml 11.5% Optiprep was  
131 carefully transferred onto the cell suspensions, followed by 12 ml of GBSS.  
132 Following centrifugation at 1,420 x g for 20 min, the HSCs were removed from the  
133 top of the 11.5% Optiprep layer. The freshly isolated cells were cultured in DMEM  
134 with 10% FBS and maintained at 37°C in a humidified 5% CO<sub>2</sub> atmosphere. The  
135 viabilities of the HCs and HSCs were assessed by trypan blue exclusion and the purity  
136 were tested using glial fibrillary acidic protein (GFAP) (quiescent HSC marker; 1:100;  
137 16825-1-AP, Proteintech Group, China), Acta2 (activated HSC marker; 1/100; ab7817;  
138 Abcam, Cambridge, UK) and cytokeratin 18 (HC marker; 1:100; 10830-1-AP,  
139 Proteintech Group) (Supplementary Fig. 1). To further confirm the effects of LXRs  
140 and Hh signaling on HSC activation, after 3 days of isolation, primary HSCs were  
141 treated with LXR agonist T0901317 (5  $\mu$ M) or antagonist SR9238 (10  $\mu$ M), and Hh  
142 agonist Purmorphamine (2  $\mu$ M) or antagonist GDC0449 (5  $\mu$ M) (MedChemExpress,  
143 Monmouth Junction, NJ, USA). The siRNA targeting mouse LXR $\alpha$  and LXR $\beta$   
144 sequences, constructed by Genepharma (Shanghai, China), were transfected according  
145 to the manufacturer's instructions. The siRNA sequences were as follows: LXR $\alpha$   
146 sense, 5'-GGCAACACUUGCAUCCUUATT-3'; and antisense,  
147 5'-UAAGGAUGCAAGUGUUGCCTT-3'; LXR $\beta$  sense,  
148 5'-CAUCCACCAUCGAGAUCAUTT-3'; and antisense,  
149 5'-AUGAUCUCGAUGGUGGAUGTT-3'; control scramble sense,

150 5'-UUCUCCGAACGUGUCACGUTT-3'; and antisense,  
151 5'-ACGUGACACGUUCGGAGAATT-3'.

152

### 153 **3. Immunohistochemistry and immunofluorescence**

154 The mouse livers were fixed in 4% paraformaldehyde and embedded in paraffin  
155 for hematoxylin-eosin (H&E), Masson, Sirius red and immunohistochemical staining.  
156 For immunochemical staining, the paraffin-embedded sections were dewaxed with  
157 xylene, rehydrated with alcohol and heated with citrate buffer for antigen retrieval.  
158 The sections were incubated with 3% peroxide to block endogenous peroxidase and  
159 then incubated in 0.5% Triton X-100 for 15 min. Following blocking with 5% goat  
160 serum solution for 40 min at 37°C, the sections were stained with anti-Acta2 (1:400)  
161 at 4°C overnight. The sections were further processed by the application of the  
162 immunoperoxidase technique, using the Envision kit (Boster Biological Technology,  
163 China). For immunofluorescence analysis, the samples were incubated with  
164 anti-LXR $\alpha$  (1:100; ab3585, Abcam), anti-LXR $\beta$  (1:100; ab228867, Abcam),  
165 anti-Acta2 (1:100) and anti-nuclear transcription factor Gli family zinc finger (Gli)2  
166 (1:100; bs-11564R; Bioss, China) overnight at 4°C, followed by incubation with  
167 fluorescein isothiocyanate-labeled goat anti-rabbit and anti-mouse secondary antibody  
168 (Alexa Fluor; Invitrogen; Thermo Fisher Scientific, Inc.). DAPI was applied to each  
169 section for 10 min to counterstain the nuclei.

170

### 171 **4. Western blot analysis**

172 Cells or liver samples were lysed in radioimmunoprecipitation assay buffer with  
173 protease inhibitors, and the concentration of the resulting protein extract was  
174 measured using the bicinchoninic acid assay. The extracted proteins were separated  
175 by SDS-PAGE (10% gel) and transferred to polyvinylidene difluoride membranes.  
176 The membranes were blocked with 5% non-fat milk and immunological detection was  
177 performed with the following primary antibodies: Acta2 (1:1,000), collagen I (1:500;  
178 14695-1-AP; Proteintech, Rosemont, IL, USA), LXR $\alpha$  (1:1,000), LXR $\beta$  (1:1000),  
179 sterol regulatory element binding protein-1c (Srebp1-c; 1:1000; ab28481; Abcam),

180 ATP binding cassette subfamily A member 1 (Abca1; 1:500, Ag24118; Proteintech),  
181 Patched (Ptch; 1:1,000; PA5-18544, RRID AB\_10983895; Thermo Fisher Scientific,  
182 Inc.) and sonic hedgehog homolog (Shh; 1:500, 20697-1-AP; Proteintech) overnight  
183 at 4°C, followed by incubation with a peroxidase-coupled secondary antibody for 1 h  
184 at 37°C. The blots were visualized using an enhanced chemiluminescence kit  
185 (Amersham, UK).

186

## 187 **5. Quantitative Real-Time Polymerase Chain Reaction (PCR)**

188 Total RNA was extracted from the cells or tissue samples using the RNeasy Mini  
189 Kit (Qiagen, Valencia, CA), following the manufacturer's instructions. Equal amounts  
190 of total RNA from each sample was prepared and reverse transcribed into  
191 complementary DNA. Supplementary Table 1 lists the specific oligonucleotide  
192 primers used. The PCR thermocycling conditions were as follows: 95°C for 30 s  
193 followed by 39 cycles of 95°C for 5 s and 56°C for 30 s using SyBr Green reagents  
194 (Biosystems, Foster City, CA). The gene expression was calculated using the  $2^{-\Delta\Delta Ct}$   
195 method and normalized to the housekeeping gene GAPDH.

196

## 197 **6. Statistical analysis**

198 All data were analyzed using SPSS version 19.0 software. Quantitative data are  
199 expressed as the mean  $\pm$  standard deviation of at least 5 independent experiments for  
200 animal studies, and at least 3 independent experiments for each cell experimental  
201 group. The groups were analyzed using Student's t-test and  $P < 0.05$  was considered to  
202 indicate statistically significant differences.

203

## 204 **Results**

### 205 **1. LXRs decreased during HSCs activation**

206 Plating HSCs on plastic dishes can artificially cause their activation [20].  
207 Therefore, in order to identify the underlying mechanisms of HSC activation, we  
208 tested gene expression in freshly isolated HSCs from healthy mice for 168 h. The

209 freshly isolated quiescent HSCs had a round, phase-dense cell appearance with large  
210 numbers of refractile lipid droplets, which appeared garland-like by Oil red O staining.  
211 The purity of the HSCs was approximately 90%, as determined by quiescent HSC  
212 marker GFAP and activated HSC marker Acta2 (Fig. 1A). Notably, collagen I and  
213 Acta2, regarded as specific markers of HSC activation, exhibited a marked  
214 upregulation during *in vitro* HSC culture (Fig. 1B). LXR $\alpha$  and LXR $\beta$ , and their target  
215 genes Srebp1 and Abca1 significantly decreased during HSC activation (Fig. 1C). The  
216 protein levels of the indicators of HSC activation, LXRs and their target genes were  
217 further confirmed by western blotting. The observed trend for each protein was  
218 consistent with the corresponding mRNA expression (Fig. 1D). The results confirm  
219 that both of LXR $\alpha$  and LXR $\beta$  may play roles in HSCs activation.

220

## 221 **2. LXR $\beta$ , but not LXR $\alpha$ , regulates HSCs activation in mice**

222 According to previous studies, primary isolated HSCs are activated and induce  
223 high levels of activation markers Acta2 and collagen I *in vitro* following 72 h of  
224 culture [21]. Therefore, in the present study, freshly isolated HSCs were tested  
225 following culture for 72 h. Firstly, an LXR agonist and antagonist were tested to  
226 confirm the regulatory effect of LXRs on the activation of mouse primary HSCs. As  
227 expected, LXR agonist T0901317 led to a significant increase in the mRNA levels of  
228 Abca1 and Srebp1, and suppressed the activation of the mouse primary HSCs. In  
229 addition, LXR antagonist SR9238 decreased the expression of LXR target genes and  
230 notably promoted the activation of HSCs ( $P < 0.05$ ; Fig. 2A). Subsequently, the  
231 endogenous expression levels of LXR $\alpha$  and LXR $\beta$  were measured in mice primary  
232 HCs and HSCs, and normalized to the levels of the housekeeping gene GAPDH.  
233 LXR $\alpha$  was mainly expressed in HCs, while, HSCs expressed high levels of LXR $\beta$   
234 ( $P < 0.01$ ; Fig. 2B). Similarly, freshly isolated HSCs exhibited strong nuclear  
235 expression of LXR $\beta$ , but almost undetectable levels of LXR $\alpha$  after culture for 24 h  
236 (Fig. 2C). Furthermore, we determined the effect of the knockdown of each LXR  
237 isoform on the expression of major LXR target genes and the activation of HSCs.  
238 After 72 h of culture, siRNA was used to silence LXR $\alpha$  or LXR $\beta$  in mouse primary



239 HSCs. The cells in the control group were transfected with siRNA containing a  
240 scrambled sequence. Despite efficient silencing, no obvious effect by the LXR $\alpha$   
241 knockdown was observed on Abca1 or Srebp1 on the transcription level, and no  
242 significant activation of HSCs was noted ( $P>0.05$ ). In contrast, LXR $\beta$  silencing led to  
243 a notable decrease in the expression levels of LXR target genes, and promoted HSCs  
244 activation, as measured by Acta2 and collagen I mRNA expression ( $P<0.05$ ; Fig. 2D).  
245 The impact of LXR $\alpha$  and LXR $\beta$  silencing was also investigated at the protein level.  
246 Compared with the mRNA results, similar changes in the protein levels were observed  
247 by western blot analysis (Fig. 2E). Additionally, HSCs in the LXR $\beta$ -silenced group  
248 exhibited a high expression of Acta2 and displayed more fibrocyte morphological  
249 features, in contrast with the LXR $\alpha$ -silenced group (Fig. 2F). These results indicate  
250 that LXR $\beta$ , but not LXR $\alpha$ , regulates the LXR target genes and suppresses the  
251 activation of mouse primary isolated HSCs.

252

### 253 **3. Overexpression of LXR $\beta$ inhibits CCl<sub>4</sub>-inducing liver fibrosis and HSCs** 254 **activation in mice**

255 CCl<sub>4</sub>-induced chronic liver injury was adopted to investigate whether LXR $\beta$   
256 serves a role in HSC activation and fibrogenesis *in vivo*. After C57/BL6 mice received  
257 IP injections of CCl<sub>4</sub> for 5 weeks, hepatic histopathology was evaluated by H&E,  
258 Sirius Red and Masson staining. According to the histology, the mice in the control  
259 vehicle group presented normal liver architecture, whereas the livers of the  
260 Ad-control-CCl<sub>4</sub>-treated mice, which received empty control adenovirus vector and  
261 CCl<sub>4</sub>, displayed extensive structural disorganization, with the beginnings of septa  
262 formation between adjacent vascular structures, and evidence of fibrosis completely  
263 surrounding certain parenchymal nodules. The livers of the T0901317-CCl<sub>4</sub> treatment  
264 group displayed less septa formation, but were characterized by diffuse distribution of  
265 hepatic microvesicular steatosis, caused by the LXR $\alpha$  activation. Furthermore, the  
266 Ad-LXR $\beta$ -CCl<sub>4</sub> treatment resulted in a significantly lower degree of septa formation  
267 compared with the Ad-control-CCl<sub>4</sub> treatment, and overexpression of LXR $\beta$  did not  
268 induce the pathological features of liver steatosis (Fig. 3A). Subsequently, we

269 compared the effect of T0901317-stimulated and adenovirus-mediated LXR $\beta$   
270 overexpression on LXR target genes at the protein level by western blot analysis. The  
271 T0901317-treated group displayed a significant increase in Abca1 and Srebp1 levels,  
272 compared with the control groups (control vehicle and Ad-control-CCl<sub>4</sub>). However,  
273 overexpression of LXR $\beta$  in the mice resulted in just a moderate increase of the  
274 expression of Abca1 and Srebp1, suggesting that activation of LXR $\beta$  does not  
275 significantly impact the lipid metabolism in the liver (Fig. 3C). Acta2 staining was  
276 performed to observe the infiltration of activated HSCs in the liver following chronic  
277 injury. The population of Acta2<sup>+</sup> cells was greatly increased in the  
278 Ad-control-CCl<sub>4</sub>-treated mice compared with those in the mice treated with the  
279 control vehicle, indicating that chronic liver injury can produce significant HSC  
280 activation (P<0.01; Fig. 3B and E). Conversely, the number of Acta2<sup>+</sup> cells was  
281 markedly lower in the LXR $\beta$ -overexpressed mice compared with that in the  
282 Ad-control-CCl<sub>4</sub>-treated mice (P<0.05; Fig. 3B and D). These data suggest that LXR $\beta$   
283 suppresses the process of HSC activation and inhibits fibrogenesis in a fibrosis mouse  
284 model without resulting in liver steatosis.

285

#### 286 **4. LXR $\beta$ may inhibit HSC activation *in vivo* via Hh signaling**

287 Hh signaling is crucial in developmental pattern formation, and stem cell growth  
288 and maintenance [22]. This signaling pathway is dormant in the livers of healthy  
289 adults, and is activated during liver injury, which triggers the production of Hh  
290 ligands and the expression of Hh target genes. It has been reported that Hh signaling  
291 is important for HSC activation and liver fibrogenesis [23,24]. As Hh signaling is  
292 negatively regulated by LXR [25,26], we hypothesized that the role of LXR $\beta$  in the  
293 regulation of HSC activation and fibrogenesis is exerted via Hh signaling. In order to  
294 test this hypothesis, the Hh pathway activity was investigated in CCl<sub>4</sub>-induced liver  
295 injury. Double immunofluorescence for Acta2 and Gli2, a main Hh target gene, was  
296 performed to assess Hh signaling in activated HSCs. Fig. 4A demonstrates the nuclear  
297 Gli2 localization in activated, Acta2<sup>+</sup> HSCs in the livers of CCl<sub>4</sub>-treated mice, and the  
298 low expression in the healthy livers of the control vehicle group. Notably, the livers

299 from the Ad-control-CCl<sub>4</sub>-treated group exhibited markedly increased Gli2 nuclear  
300 staining in myofibroblastic cells located in the fibrotic areas (4.6-fold increase vs.  
301 control). However, the overexpression of LXR $\beta$  significantly suppressed the number  
302 of Acta2<sup>+</sup> cells as well as the nuclear expression of Gli2 (P<0.01; Fig. 4A and B).  
303 Furthermore, compared with the control vehicle group, the upregulation of Gli2  
304 protein levels in CCl<sub>4</sub>-induced fibrotic liver was accompanied by an increase in  
305 collagen I and Acta2 protein levels. These results indicate that Hh signaling is  
306 involved in HSC activation and fibrosis. The overexpression of LXR $\beta$  in CCl<sub>4</sub>-treated  
307 mice led to a decrease in the expression of Gli2, collagen I and Acta2 (P<0.05; Fig.  
308 4C), suggesting that LXR $\beta$  may affect Hh signaling and HSCs activation *in vivo*.

309

### 310 **5. LXR $\beta$ inhibits HSC activation via Hh signaling *in vitro***

311 Hh signaling activation occur at several levels of the signal transduction cascade  
312 [27,28,29]. Briefly, Hh signaling is initiated by Ptch, the cell surface receptor for the  
313 Hh ligand, binding of Shh Sonic hedgehog (Shh), a main mammalian Hh signaling  
314 ligand. This interaction permits the propagation of intracellular signals that culminate  
315 in the nuclear localization of Gli transcription factors, especially Gli2, and regulate  
316 the expression of Hh signaling target genes, including amplifications of Ptch and Gli.  
317 To further support the aforementioned hypothesis, mouse primary HSCs were isolated  
318 and cultured for 168 h. We found that the HSC activation process was accompanied  
319 by the activation of Hh signaling. Ptch and Gli2 were almost undetectable in freshly  
320 isolated, quiescent HSCs, but significantly upregulated during HSC activation  
321 (P<0.01; Fig. 5A and B). An Hh agonist and antagonist were then used to test the role  
322 of Hh signaling in the activation of HSCs. Accordingly, the mRNA expression levels  
323 of collagen I and Acta2 were upregulated by approximately 3.3- and 2.1-fold,  
324 respectively, following treatment with Hh agonist Purmorphamine compared with  
325 vehicle (P<0.01; Fig. 5C). In contrast, following treatment with Hh antagonist  
326 GDC0449, the levels of collagen I and Acta2 mRNA decreased by approximately 51  
327 and 53%, respectively (P<0.05; Fig. 5C). These data demonstrate that Hh signaling is  
328 essential for HSC activation and fibrosis. To further confirm that Hh signaling

329 controls HSC activation and is mediated by LXR $\beta$ , we transfected siRNA targeting  
330 LXR $\alpha$  or LXR $\beta$ , or adenovirus-mediated vectors overexpressing LXR $\alpha$  or LXR $\beta$  into  
331 HSCs, and observed their effects on Hh signaling. Silencing LXR $\beta$  in HSCs led to a  
332 marked upregulation of Hh target genes Gli2 and Ptch, and HSC activation markers  
333 collagen I and Acta2. Additionally, we observed that overexpression of LXR $\beta$   
334 decreased the expression of Gli2 and Ptch in HSCs, and suppressed their activation, as  
335 measured by collagen I and Acta2 protein levels ( $P < 0.05$ ; Fig. 5D). Conversely, in the  
336 LXR $\alpha$  overexpression or knockdown groups, no significant differences were observed  
337 in the expression of Hh target genes or the levels of the HSC activation marker  
338 proteins, compared with the control group ( $P > 0.05$ ; Fig. 5D). This supports the  
339 conclusion that LXR $\beta$  is the main LXR isoform regulating HSC activation.  
340 Furthermore, double immunostaining for Gli2 and Acta2 was performed to assess the  
341 effects of LXR $\beta$  on Hh signaling in HSCs. Compared with the control  
342 vector-transfected group, the HSCs displayed higher Gli2 expression and more  
343 mesenchymal phenotype characteristics with fibroblast-like features under LXR $\beta$   
344 knockdown conditions. On the other hand, HSCs transfected with Ad-LXR $\beta$  exhibited  
345 suppressed nuclear Gli2 expression and maintained a more quiescent phenotype (Fig.  
346 5E). Finally, to further determine the plausible mechanisms of LXR $\beta$  inhibits Hh  
347 signaling, we transfected Ad-LXR $\beta$  in the presence of Hh agonist Purmorphamine or  
348 siRNA targeting LXR $\beta$  in the presence of Hh antagonist GDC0449 in HSCs. As  
349 shown in Fig. 5F, purmorphamine significantly induced the protein expression of Hh  
350 target genes Ptch and Gli2, and upregulated HSC activation markers collagen I and  
351 Acta2 in HSCs. Overexpression of LXR $\beta$  did not block purmorphamine-stimulated  
352 induction of Ptch and Gli2 but partially inhibited the upregulation of HSC activation  
353 markers. In contrast, GDC0449 significantly inhibited the protein levels of Ptch, Gli2,  
354 collagen I and Acta2 in HSCs, while silencing LXR $\beta$  partially rescued the inhibiting  
355 effects of GDC0449. Thus, Hh signaling is only a part of complex mechanisms for  
356 LXR $\beta$ -influenced HSC activation. Additionally, Hh ligands Shh was drastically  
357 upregulated by purmorphamine treatment, but completely abolished while  
358 overexpression of LXR $\beta$  in HSCs, indicating that LXR $\beta$  influences the Hh signaling

359 by inhibiting Hh ligands production. Together, the results reveal that LXR $\beta$  plays an  
360 important role in inhibiting HSC activation through regulating Hh signaling.

361

## 362 **Discussion**

363 Hepatic fibrosis cause mass mortality in the worldwide [30], but effective  
364 antifibrotic therapies are yet to be developed. Despite the fact that HSCs are a  
365 universal source for myofibroblasts in the liver, with an important function in viral,  
366 toxic, biliary and fatty liver diseases, the detailed molecular mechanisms of their  
367 activation are only partially understood, highlighting the need for further research [31].  
368 LXRs are key regulators of hepatic lipogenesis and cholesterol homeostasis, and  
369 display anti-inflammatory and antifibrotic effects in HSCs [11,32]. Several  
370 pharmaceutical companies have been actively researching LXR agonists to activate  
371 LXR $\alpha$  and LXR $\beta$ , and efficiently induce the expression of LXR target genes,  
372 including Abca1 and Srebp1 [33]. However, the activation of LXR $\alpha$  leading to  
373 enhanced hepatic triglyceride synthesis and adverse side effects, including liver  
374 steatosis and hypertriglyceridemia, have hindered therapeutic development. Therefore,  
375 it is important to ascertain the relative contributions of the two LXR isoforms in the  
376 process of HSC activation.

377 Notably, immortalized HSC lines, such as Lx2 and Hsc-T6, are poor model  
378 systems for the study of HSC activation, because these cells are already activated and  
379 resistant to transformation. For this reason, purified primary HSCs were used in the  
380 present study, which confirmed that the expression levels of the LXRs and their target  
381 genes, Srebp1 and Abca1, were significantly decreased during HSC activation.  
382 Quiescent HSCs store large amounts of lipid and 80% of the body's total vitamin A,  
383 but rapidly lose lipid droplets and induce the expression of activation markers when  
384 they differentiate into myofibroblasts upon stimulation. Therefore, LXRs as the key  
385 regulators of the significant changes that lipogenesis undergoes during HSC activation  
386 [12]. In contrast to HCs, in which LXR $\alpha$  plays a major role, HSCs mainly express  
387 high levels of LXR $\beta$ . In HSCs, LXR $\beta$  is the main regulatory isoform for the LXR  
388 target genes; knockdown of LXR $\beta$  resulted in significant decrease in Srebp1 and

389 Abca1 expression, and enhanced the activation of HSCs *in vitro*. On the other hand,  
390 no obvious effect of LXR $\alpha$  silencing was observed on the expression of LXR target  
391 genes or the activation of HSCs (Fig. 2C). Based on this result, activated LXR $\beta$  can  
392 inhibit HSC activation, while avoiding any effect on HCs, in which LXR $\alpha$  exerts a  
393 dominant regulatory function. Indeed, in a CCl<sub>4</sub>-induced liver fibrosis mouse model,  
394 overexpressed LXR $\beta$  led to the inhibition of HSC activation and fibrogenesis (Fig. 3A,  
395 B and E). Although similar findings were revealed in the T0901317-treated group,  
396 H&E staining demonstrated a diffused distribution of microvesicular steatosis in the  
397 liver (Fig. 3A). As HCs, liver sinusoidal endothelial cells and Kupffer cells, in which  
398 LXR $\alpha$  serves a dominant role, constitute approximately 60, 19 and 10% of the liver  
399 cell population, respectively, compared with HSCs, which mainly express LXR $\beta$  and  
400 account for just 8% [34,35,36]. In T0901317-treated mice, the two LXR isoforms  
401 were activated in parallel and led to marked upregulation of Srebp1 and Abca1, the  
402 main regulators of triglyceride synthesis and cholesterol metabolism [37].  
403 Overexpression of LXR $\beta$  in mice resulted in the expression of Srebp1 and Abca1  
404 being only moderately increased, suggesting that activation of LXR $\beta$  does not  
405 significantly affect liver lipid metabolism (Fig. 3D). Therefore, the results of the  
406 present study verify the antifibrotic role of LXRs, and establish an antifibrotic  
407 mechanism for LXR $\beta$ , avoiding HSC activation-associated fibrosis and undesirable  
408 side-effect of LXR $\alpha$  activation simultaneously. Furthermore, we found that LXR $\beta$   
409 regulates Hh signaling in HSC activation.

410 Hh signaling, a crucial developmental regulator during embryogenesis, is  
411 inactive in the healthy adult liver, but becomes reactivated during liver injury. Under  
412 conditions of liver damage, increased levels of Hh ligands activate cell surface  
413 receptor Ptch and upregulate the expression of nuclear transcription factor Gli2 [38].  
414 During this process, Hh signaling promotes the transition of quiescent HSCs to  
415 activated myofibroblastic HSCs, which produce large amounts of collagen and  
416 extracellular matrix [39]. And activated HSCs also secrete Hh ligands, which then  
417 through autocrine and paracrine role to further activate Hh signaling in a positive  
418 feedback loop. In the present study, the expression of Gli2 was low in the control

419 group, but greatly increased in CCl<sub>4</sub>-treated mice, and importantly, Gli2 was mainly  
420 located in the fibrotic areas and localized in activated Acta2<sup>+</sup> HSCs. According to this  
421 result, HSCs may be the main responsive cell in which Hh signaling occurs during the  
422 process of liver damage and fibrosis. Subsequently, overexpression of LXRβ  
423 significantly decreased the number of Acta2<sup>+</sup> cells and their nuclear expression of  
424 Gli2 in CCl<sub>4</sub>-treated mice (Fig. 4A and B). Using cultured mouse primary HSCs, we  
425 verified the contribution of Hh signaling to HSC activation *in vitro* (Fig. 5A, B and C).  
426 We further confirmed the underlying molecular mechanisms between LXRβ and Hh  
427 signaling in HSC activation. Despite LXRβ suppressing Hh signaling and regulating  
428 the expression of Hh target genes Gli2 and Ptch, which are closely associated with  
429 HSC activation, no influence of LXRα on Hh signaling or HSCs activation was  
430 observed (Fig. 5D). Although it is reported that LXRα and LXRβ co-regulate several  
431 genes, and can compensate for one another in many pathological conditions, in our  
432 present study, LXRβ deletion or overexpression was not compensated by LXRα.  
433 Finally, we primarily explored the possible mechanism of HSC activation that LXRβ  
434 seems to suppress the Hh signaling by inhibiting Hh ligands production (Fig. 5F). As  
435 Hh ligands production to induce Hh signaling by at least two mechanisms, whether  
436 increasing Hh ligand expression or prolonging its half-life. Thus, much more  
437 researches need be done to explore the molecular mechanisms between LXRβ and Hh  
438 signaling.

439 HSCs are the most relevant source of hepatic myofibroblasts in liver fibrosis,  
440 and activated HSCs secrete several inflammatory factors that exacerbate liver injury  
441 [40]. Suppressing HSC activation and restoring the quiescent phenotype may be a  
442 promising strategy for the development of therapies against fibrosis. The results of the  
443 present study demonstrate that LXRβ regulates the activation of HSCs and prevents  
444 CCl<sub>4</sub>-induced fibrosis via Hh signaling, simultaneously avoiding undesirable  
445 LXRα-associated liver steatosis side-effects. Specific activators of LXRβ may be used  
446 as potential therapeutic agents against liver fibrosis.

447

448 **Conflict of interest**



449 The authors have no potential conflicts of interest to declare.

450

## 451 **Acknowledgements**

452 This study was supported by the National Natural Science Foundation of China  
453 [grant number 81400612, 81270494 and 81500443]

454

## 455 **References**

- 456 **1.** Matsuoka M, Tsukamoto H. Stimulation of hepatic lipocyte collagen production by  
457 Kupffer cell-derived transforming growth factor beta: implication for a pathogenetic  
458 role in alcoholic liver fibrogenesis [J]. *Hepatology*, 1990, 11(4):599-605.
- 459 **2.** Bronfenmajer S, Schaffner F, Popper H. Fat-storing cells (lipocytes) in human liver  
460 [J]. *Arch Pathol*, 1966, 82(5):447-453.
- 461 **3.** Wake K. "Sternzellen" in the liver: perisinusoidal cells with special reference to  
462 storage of vitamin A [J]. *Am J Anat*, 1971, 132(4):429- 462.
- 463 **4.** Lotersztajn S, Julien B, Teixeira-Clerc F, et al. Hepatic fibrosis: molecular  
464 mechanisms and drug targets.[J]. *Annual Review of Pharmacology & Toxicology*,  
465 2005, 45(45):605-628.
- 466 **5.** Friedman S L. Hepatic stellate cells: protean, multifunctional, and enigmatic cells  
467 of the liver [J]. *Physiological Reviews*, 2008, 88(1):125-172.
- 468 **6.** Rockey D C, Boyles J K, Gabbiani G, et al. Rat hepatic lipocytes express smooth  
469 muscle actin upon activation in vivo and in culture.[J]. *Journal of Submicroscopic*  
470 *Cytology & Pathology*, 1992, 24(2):193-203.
- 471 **7.** Atzori L, Poli G, Perra A. Hepatic stellate cell: A star cell in the liver [J].  
472 *International Journal of Biochemistry & Cell Biology*, 2009, 41(8–9):1639-1642.
- 473 **8.** She H, Xiong S, Hazra S, et al. Adipogenic transcriptional regulation of hepatic  
474 stellate cells.[J]. *Journal of Biological Chemistry*, 2005, 280(6):4959-67.
- 475 **9.** Morello F, Saglio E, Noghero A, et al. LXR-activating oxysterols induce the  
476 expression of inflammatory markers in endothelial cells through LXR-independent  
477 mechanisms.[J]. *Atherosclerosis*, 2009, 207(1):38.
- 478 **10.** Viennois E, Pommier A J, Mouzat K, et al. Targeting liver X receptors in human  
479 health: deadlock or promising trail?[J]. *Expert Opinion on Therapeutic Targets*, 2011,  
480 15(2):219.
- 481 **11.** O'Mahony F, Wroblewski K, O'Byrne S M, et al. Liver X receptors balance lipid



- 482 stores in hepatic stellate cells through Rab18, a retinoid responsive lipid droplet  
483 protein.[J]. *Hepatology*, 2015, 62(2):615-626.
- 484 **12.** Beaven SW; Wroblewski K; Wang J; Hong C; Bensinger S; Tsukamoto H;  
485 Tontonoz P. Liver X Receptor Signaling Is a Determinant of Stellate Cell Activation  
486 and Susceptibility to Fibrotic Liver Disease[J]. *Gastroenterology*, 2011,  
487 140(3):1052-1062.
- 488 **13.** Uppal H, Saini S P, Moschetta A, et al. Activation of LXRs prevents bile acid  
489 toxicity and cholestasis in female mice [J]. *Hepatology*, 2007, 45(2):422–432.
- 490 **14.** Mallat A, Lotersztajn S. The liver X receptor in hepatic stellate cells: a novel  
491 antifibrogenic target [J]. *Journal of Hepatology*, 2011, 55(6):1452-1454.
- 492 **15.** Bischoff E D, Daige C L, Petrowski M, et al. Non-redundant roles for LXRalpha  
493 and LXRbeta in atherosclerosis susceptibility in low density lipoprotein receptor  
494 knockout mice[J]. *Journal of Lipid Research*, 2010, 51(5):900-906.
- 495 **16.** Choi S S, Syn W K, Karaca G F, et al. Leptin promotes the myofibroblastic  
496 phenotype in hepatic stellate cells by activating the Hedgehog pathway.[J]. *Journal of*  
497 *Biological Chemistry*, 2010, 285(47):36551.
- 498 **17.** Xie G, Karaca G, Swiderskasyn M, et al. Cross-talk between Notch and Hedgehog  
499 Regulates Hepatic Stellate Cell Fate [J]. *Hepatology*, 2013, 58(5):1801-1813.
- 500 **18.** Yang L, Wang Y, Mao H, et al. Sonic hedgehog is an autocrine viability factor for  
501 myofibroblastic hepatic stellate cells.[J]. *Journal of Hepatology*, 2008, 48(1):98-106.
- 502 **19.** Zhong L, Huang L, Xue Q, et al. Cell-specific elevation of Runx2 promotes  
503 hepatic infiltration of macrophages by upregulating MCP-1 in high-fat diet-induced  
504 mice NAFLD.[J]. *J Cell Biochem*. 2019;1-14.
- 505 **20.** Olsen A L, Bloomer S A, Chan E P, et al. Hepatic stellate cells require a stiff  
506 environment for myofibroblastic differentiation [J]. *Am J Physiol Gastrointest Liver*  
507 *Physiol*, 2011, 301(1):G110.
- 508 **21.** Mannaerts I, Leite S B, Verhulst S, et al. The Hippo pathway effector YAP  
509 controls mouse hepatic stellate cell activation [J]. *Journal of Hepatology*, 2015,  
510 63(3):679-688.
- 511 **22.** Varjosalo M, Taipale J. Hedgehog: functions and mechanisms [J]. *Genes Dev*,  
512 2008, 22(18):2454-2472.
- 513 **23.** Xie G, Karaca G, Swiderskasyn M, et al. Cross-talk between Notch and Hedgehog

- 514 regulates hepatic stellate cell fate in mice [J]. *Hepatology*, 2013, 58(5):1801-1813.
- 515 **24.** Choi S S, Syn W K, Karaca G F, et al. Leptin Promotes the Myofibroblastic  
516 Phenotype in Hepatic Stellate Cells by Activating the Hedgehog Pathway[J]. *Journal*  
517 *of Biological Chemistry*, 2010, 285(47):36551.
- 518 **25.** Kim W K, Meliton V, Park K W, et al. Negative regulation of Hedgehog signaling  
519 by liver X receptors.[J]. *Molecular Endocrinology*, 2009, 23(10):1532-1543.
- 520 **26.** Agarwal J R, Wang Q, Tanno T, et al. Activation of liver X receptors inhibits  
521 hedgehog signaling, clonogenic growth, and self-renewal in multiple myeloma.[J].  
522 *Molecular Cancer Therapeutics*, 2014, 13(7):1873-1881.
- 523 **27.** Schou K B , Mogensen J B , Morthorst S K , et al. KIF13B establishes a  
524 CAV1-enriched microdomain at the ciliary transition zone to promote Sonic hedgehog  
525 signalling[J]. *Nature Communications*, 2017, 8:14177.
- 526 **28.** Ingham P W . Hedgehog signalling[J]. *Current Biology*, 2008, 18(6):0-0.
- 527 **29.** Hooper J E, Scott M P. Communicating with Hedgehogs.[J]. *Nature Reviews*  
528 *Molecular Cell Biology*, 2005, 6(4):306.
- 529 **30.** Mehal WZ, Iredale J, Friedman SL. Scraping fibrosis: expressway to the core of  
530 fibrosis [J]. *Nature Medicine*, 2011, 17(5):552-553.
- 531 **31.** Mederacke I, Hsu C C, Troeger J S, et al. Fate-tracing reveals hepatic stellate cells  
532 as dominant contributors to liver fibrosis independent of its etiology [J]. *Nature*  
533 *Communications*, 2013, 4(7):2823.
- 534 **32.** Sean B. Joseph, Antonio Castrillo, Bryan A. Laffitte, et al. Reciprocal regulation  
535 of inflammation and lipid metabolism by liver X receptors[J]. *Nature Medicine*, 2003,  
536 9(2):213-219.
- 537 **33.** Bernotas R C, Singhaus R D. 4-(3-Aryloxyaryl)quinoline sulfones are potent liver  
538 X receptor agonists[J]. *Bioorganic & Medicinal Chemistry Letters*, 2010,  
539 20(1):209-212.
- 540 **34.** Godoy P, Hewitt N J, Albrecht U, et al. Recent advances in 2D and 3D in vitro  
541 systems using primary hepatocytes, alternative hepatocyte sources and  
542 non-parenchymal liver cells and their use in investigating mechanisms of  
543 hepatotoxicity, cell signaling and ADME[J]. *Archives of Toxicology*, 2013,  
544 87(8):1315-1530.
- 545 **35.** Ishibashi M, Filomenko R, Rébé C, et al. Knock-down of the oxysterol receptor  
546 LXR $\alpha$  impairs cholesterol efflux in human primary macrophages: lack of  
547 compensation by LXR $\beta$  activation.[J]. *Biochemical Pharmacology*, 2013,

548 86(1):122-129.

549 **36.** Xing Y, Zhao T, Gao X, et al. Liver X receptor  $\alpha$  is essential for the capillarization  
550 of liver sinusoidal endothelial cells in liver injury[J]. Scientific Reports, 2016,  
551 6:21309.

552 **37.** Yamamoto T, Shimano H, Inoue N, et al. Protein Kinase A suppresses SREBP-1c  
553 expression via phosphorylation of LXR in the liver[J]. Journal of Biological  
554 Chemistry, 2007.

555 **38.** Omenetti A, Choi S, Michelotti G, et al. Hedgehog signaling in the liver.[J].  
556 Journal of Hepatology, 2011, 54(2):366-373.

557 **39.** Greenbaum L E. Hedgehog signaling in biliary fibrosis.[J]. Journal of Clinical  
558 Investigation, 2008, 118(10):3263-5.

559 **40.** Tan Z, Qian X, Jiang R, et al. IL-17A plays a critical role in the pathogenesis of  
560 liver fibrosis through hepatic stellate cell activation [J]. Journal of Immunology, 2013,  
561 191(4):1835-1844.

562

### 563 **Figure legends**

564

565 **Figure 1: LXRs decrease during HSC activation.** (A) a, Images of freshly isolated,  
566 quiescent HSCs cultured for 24 h; HSCs appear as round, phase-dense cells  
567 containing refractile lipid droplets. b, Oil red O staining of HSCs cultured for 24 h;  
568 HSCs displayed abundant garland-like lipid droplets in the cytoplasm. c,  
569 Immunohistochemical staining of HSCs cultured for 24 h; HSCs were positive for the  
570 quiescent HSC marker GFAP. d, Immunohistochemical staining of HSCs cultured for  
571 168 h; HSCs were positive for the activated HSC marker Acta2. (B) Relative mRNA  
572 expression of collagen I and Acta2 during HSC activation. (C) Relative mRNA  
573 expression of LXRs and downstream target genes Abca1 and Srebp1 during HSC  
574 activation. (D) Protein expression of collagen I, Acta2, LXR $\alpha$ , LXR $\beta$ , Srebp1 and  
575 Abca1 during HSC activation was investigated by western blotting, using  $\beta$ -actin as a  
576 loading control. DAPI was used to stain the nucleus.  $n \geq 3$ , \* $P < 0.05$ , \*\* $P < 0.01$ .

577

578 **Figure 2: Effect of LXR knockdown on the mRNA and protein levels of LXR**

579 **target genes and HSC activation.** (A) Relative mRNA expression of Abca1, Srebp1,  
580 collagen I and Acta2. HSCs were treated with T0901317 (5  $\mu$ M), SR9238 (10  $\mu$ M) or  
581 DMSO for 48 h. (B) Relative mRNA expression of endothelial LXR $\alpha$  and LXR $\beta$  in  
582 freshly isolated HSCs. (C) Expression of endothelial LXR $\alpha$  and LXR $\beta$  was  
583 investigated by immunofluorescence in freshly isolated HSCs. (D) Relative mRNA  
584 expression of LXR $\alpha$ , LXR $\beta$ , Srebp1, Abca1, collagen I and Acta2. HSCs were  
585 transfected with control, LXR $\alpha$  or LXR $\beta$  siRNA for 48 h. (E) Protein expression of  
586 LXR $\alpha$ , LXR $\beta$ , Srebp1, Abca1, collagen I and Acta2 was investigated, using  $\beta$ -actin as  
587 a loading control. HSCs were transfected with control, LXR $\alpha$  or LXR $\beta$  siRNA for 72  
588 h. (F) HSCs were transfected with control, LXR $\alpha$  or LXR $\beta$  siRNA for 72 h. Acta2  
589 was investigated by immunofluorescence. DAPI was used to stain the nucleus. Data  
590 are presented as mean  $\pm$  standard deviation.  $n \geq 3$ , \* $P < 0.05$ , \*\* $P < 0.01$ .

591

592 **Figure 3: Inhibition of HSC activation in LXR $\beta$ -overexpressed mice with**  
593 **CCl $_4$ -induced liver damage.** (A) a, H&E staining of liver samples with CCl $_4$ -induced  
594 injury. Black arrows indicate hepatic microvesicular steatosis. b, Sirius red staining  
595 was used to evaluate the hyperplastic state of collagen, indicated with red staining. c,  
596 Masson staining was used to evaluate the fibrosis, indicated with blue staining. (B)  
597 Acta2 immunohistochemical staining of liver samples with CCl $_4$ -induced injury. (C)  
598 Protein expression of LXR $\alpha$ , LXR $\beta$ , Srebp1 and Abca1 was investigated by western  
599 blotting, using GAPDH as a loading control. (D) Statistical analysis of the number of  
600 Acta2 $^+$  cells. Data are presented as mean  $\pm$  standard deviation.  $n = 5$ , \* $P < 0.05$ ,  
601 \*\* $P < 0.01$ .

602

603 **Figure 4: LXR $\beta$  inhibits HSC activation via Hh signaling *in vivo*.** (A) Double  
604 immunofluorescence staining for the Hh target Gli2 (red), and the HSCs activation  
605 marker Acta2 (green). DAPI was used to stain the nucleus. (B) Statistical analysis of  
606 the number of Gli2 $^+$  cells. (C) Protein expression of Gli2, collagen I and Acta2 was  
607 investigated by western blotting, using GAPDH as a loading control. (D) Statistical  
608 analysis of the protein expression of Gli2, collagen I and Acta2.  $n \geq 3$ , \* $P < 0.05$ ,  
609 \*\* $P < 0.01$ .

610

611 **Figure 5: LXR $\beta$  inhibits HSC activation via Hh signaling *in vitro*.** (A) Relative  
 612 mRNA expression of Gli2 and Ptch during HSC activation. (B) Protein expression of  
 613 Gli2 and Ptch during HSC activation, with  $\beta$ -actin as a loading control. (C) Relative  
 614 mRNA expression of collagen I and Acta2. HSCs were treated with Purmorphamine  
 615 (2  $\mu$ M), GDC0449 (5  $\mu$ M) or DMSO for 48 h. (D) Protein expression of Gli2, Ptch,  
 616 Collagen I and Acta2 was investigated, using  $\beta$ -actin as a loading control. HSCs were  
 617 transfected with control, LXR $\alpha$  or LXR $\beta$  siRNA, LXR $\alpha$ - or LXR $\beta$ -overexpressing  
 618 adenovirus vector for 72 h. (E) Double immunofluorescence staining for the Hh target  
 619 Gli2 (red) and the HSC activation marker Acta2 (green). HSCs were transfected with  
 620 control, LXR $\beta$  siRNA or LXR $\beta$ -overexpressing adenovirus vector for 72 h. (F)  
 621 Protein expression of Shh, Gli2, Ptch, collagen I and Acta2 was investigated, using  
 622  $\beta$ -actin as a loading control. HSCs were treated with Purmorphamine, GDC0449 and  
 623 transfected with control, LXR $\beta$ -overexpressing adenovirus vector or LXR $\beta$  siRNA for  
 624 72 h. n $\geq$ 3, \*P<0.05, \*\*P<0.01.

625  
 626  
 627  
 628

| Sequence,    |                         |                         |
|--------------|-------------------------|-------------------------|
| Gene         | Forward (5'- 3')        | Reverse (3'- 5')        |
| Acta2        | GGCATCCACGAAACCACCTA    | TAGTCGTTTGTCTTATGCTGC   |
| Collagen I   | TGGCGGTTATGACTTCAGCTT   | TTCGACTTCAGTATTGGCGGT   |
| LXR $\alpha$ | GGATGGTGGATGGAGACGTAG   | GATGCAGAGGTAGGTGGTAGG   |
| LXR $\beta$  | CTCCTGAAGGCATCCACTATCG  | ATGTCGTTCCTGCTGAAGGTGG  |
| Srebp        | GCCACAGAGCTTCCCAGCCC    | ACTTGACACACTGGGTCTGGG   |
| Abca1        | GCACAATTCCACAAGAACCGC   | CGCCAAGAACACCTTAACACG   |
| Gli2         | AGCTAGTCGTCACCGAGGAGTAC | TCGATCAGCAGTGGCTCCTCATG |
| Ptch         | CAGAGACTGGCTTCAGGGACTT  | TGCTACCTCAGGAACGGATGTT  |
| GAPDH        | AACACGGAAGGCCATGCCA     | GCATCCTGCACCACCAACTT    |

629

630 Table 1 Primer and probe sequences for real-time PCR.

631

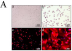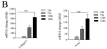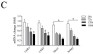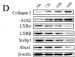

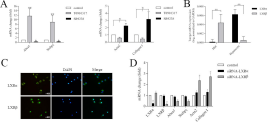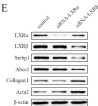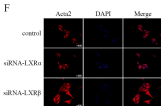



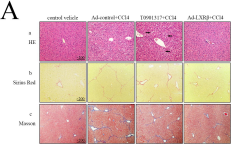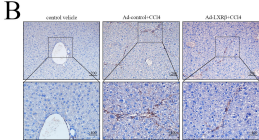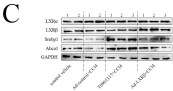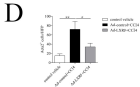

**A**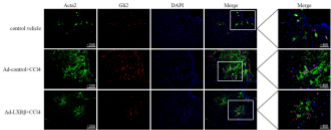**B**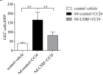**C**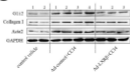**D**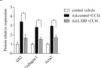

**A**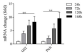**B**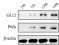**C**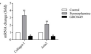**D**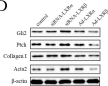**E**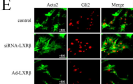**F**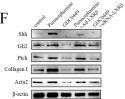

Source: https://www.biorxiv.org/content/10.1101/577833v1.full.pdf
